# Supplementary material for: Resonance-Induced Ablation (RITA): A New Alternative to Oncological Therapy
Source: Research Square preprint supplement (doi:10.21203/rs.3.rs-7285375/v1), 2025-08-19
Supplement: Supplementary file 1 [file 907134287a292299ac96566d.pdf]

# **Point-by-Point Response to Editorial Comments**

**Manuscript ID: 8b310239-6a7e-4b7d-ad8a-53cf607f2e30**

**Title: Resonance-Induced Ablation (RITA): A New Alternative to  
Oncological Therapy**

Dr. Cesar Mello

August 8, 2025

## **Responses**

**Comment 1:** Provide the same Data Availability statement in the SNAPP 'Declarations' section.

**Response:** Completed. Statement copied exactly from manuscript into 'Data Availability' field.

**Comment 2:** Upload the Supplementary Information in the supplementary file section.

**Response:** Completed. Full Supplementary Information uploaded as a single PDF under 'Supplementary Material'.
